# Supplementary material for: Identification of BoLA Alleles Associated with BLV Proviral Load in US Beef Cows
Source: MDPI journal article supplement (doi:10.3390/pathogens11101093), 2022-09-24
Supplement: s1 [file s1]

**Supplementary Table S1.** Summary Data on Study Animals

| COW_ID | BoLA_DRB3_Allele_1 | BoLA_DRB3_Allele_2 | Genotype | Proviral Load | Age (months) | Farm_Home_State | Breed |
|--------|--------------------|--------------------|----------|---------------|--------------|-----------------|-------|
| 1      | *018:01            | *018:01            | 1        | 0             | 60           | MI              | .     |
| 2      | *018:01            | *018:01            | 1        | 0             | 84           | MI              | an    |
| 3      | *018:01            | *018:01            | 1        | 0.119         | 36           | MI              | an    |
| 4      | *018:01            | *018:01            | 1        | 1.028         | 60           | MI              | an    |
| 5      | *018:01            | *018:01            | 1        | 0.002         | 48           | MI              | .     |
| 6      | *018:01            | *018:01            | 1        | 0.003         | 96           | MI              | an    |
| 7      | *018:01            | *018:01            | 1        | 0.031         | 60           | MI              | an/sm |
| 8      | *018:01            | *018:01            | 1        | 0.067         | 36           | MI              | an    |
| 9      | *018:01            | *018:01            | 1        | 0.186         | 168          | MI              | an    |
| 10     | *018:01            | *018:01            | 1        | 0.268         | 48           | MI              | an    |
| 11     | *018:01            | *018:01            | 1        | 0.282         | 24           | IA              | an    |
| 12     | *018:01            | *018:01            | 1        | 0.304         | 50           | MI              | an    |
| 13     | *018:01            | *018:01            | 1        | 0.427         | 60           | MI              | an    |
| 14     | *018:01            | *018:01            | 1        | 0.558         | 60           | MI              | an    |
| 15     | *018:01            | *018:01            | 1        | 0.761         | 108          | MI              | an    |
| 16     | *018:01            | *018:01            | 1        | 0.825         | 36           | MI              | an    |
| 17     | *018:01            | *018:01            | 1        | 0.94          | 84           | MI              | an    |
| 18     | *018:01            | *018:01            | 1        | 1.073         | 36           | MI              | an    |
| 19     | *018:01            | *018:01            | 1        | 1.083         | 72           | MI              | an    |
| 20     | *018:01            | *018:01            | 1        | 1.097         | 108          | MI              | an    |
| 21     | *018:01            | *018:01            | 1        | 1.191         | 72           | MI              | .     |
| 22     | *018:01            | *018:01            | 1        | 1.214         | 48           | IA              | an    |
| 23     | *018:01            | *018:01            | 1        | 1.226         | 60           | MI              | an    |
| 24     | *018:01            | *018:01            | 1        | 1.418         | 108          | MI              | an    |
| 25     | *018:01            | *018:01            | 1        | 1.716         | 24           | MI              | an/sm |
| 26     | *026:01            | *026:01            | 2        | 0             | 84           | MI              | an    |
| 27     | *026:01            | *026:01            | 2        | 0.202         | 60           | MI              | an    |

|    |         |         |   |       |     |    |       |
|----|---------|---------|---|-------|-----|----|-------|
| 28 | *026:01 | *026:01 | 2 | 1.38  | 84  | MI | an/sm |
| 29 | *026:01 | *026:01 | 2 | 1.609 | 120 | MI | an/ho |
| 30 | *026:01 | *026:01 | 2 | 0.152 | 108 | MI | an    |
| 31 | *026:01 | *026:01 | 2 | 0.16  | 60  | IA | an    |
| 32 | *026:01 | *026:01 | 2 | 0.185 | 73  | MI | an    |
| 33 | *026:01 | *026:01 | 2 | 0.203 | 156 | MI | an    |
| 34 | *026:01 | *026:01 | 2 | 0.255 | 24  | MI | an    |
| 35 | *026:01 | *026:01 | 2 | 0.363 | 72  | MI | an/sm |
| 36 | *026:01 | *026:01 | 2 | 0.543 | 36  | MI | an    |
| 37 | *026:01 | *026:01 | 2 | 0.662 | 48  | MI | an    |
| 38 | *026:01 | *026:01 | 2 | 0.674 | 36  | MI | an    |
| 39 | *026:01 | *026:01 | 2 | 0.841 | 36  | MI | an    |
| 40 | *026:01 | *026:01 | 2 | 1.078 | 24  | MI | an    |
| 41 | *026:01 | *026:01 | 2 | 1.082 | 108 | MI | an    |
| 42 | *026:01 | *026:01 | 2 | 1.254 | 97  | MI | an    |
| 43 | *026:01 | *026:01 | 2 | 1.287 | 108 | MI | an    |
| 44 | *026:01 | *026:01 | 2 | 1.341 | 51  | MI | an    |
| 45 | *026:01 | *026:01 | 2 | 1.598 | 108 | MI | an    |
| 46 | *033:01 | *018:01 | 3 | 0     | 60  | MI | an    |
| 47 | *033:01 | *018:01 | 3 | 0     | 84  | IA | an    |
| 48 | *033:01 | *018:01 | 3 | 0     | 95  | MI | an    |
| 49 | *033:01 | *018:01 | 3 | 0.013 | 24  | MI | an    |
| 50 | *033:01 | *018:01 | 3 | 1.106 | 48  | MI | an    |
| 51 | *002:01 | *002:01 | 4 | 0     | 72  | MI | an    |
| 52 | *002:01 | *002:01 | 4 | 0     | 24  | MI | .     |
| 53 | *002:01 | *002:01 | 4 | 0     | 60  | MI | an    |
| 54 | *002:01 | *002:01 | 4 | 0     | 84  | MI | an    |
| 55 | *002:01 | *002:01 | 4 | 0     | 156 | MI | an    |
| 56 | *002:01 | *002:01 | 4 | 0     | 48  | MI | an    |
| 57 | *002:01 | *002:01 | 4 | 0     | 60  | MI | an/sm |

|    |         |         |   |       |     |    |       |
|----|---------|---------|---|-------|-----|----|-------|
| 58 | *002:01 | *002:01 | 4 | 0     | 48  | MI | an    |
| 59 | *002:01 | *002:01 | 4 | 0     | 86  | MI | an    |
| 60 | *002:01 | *002:01 | 4 | 0.106 | 72  | MI | an/sm |
| 61 | *002:01 | *002:01 | 4 | 0.113 | 60  | MI | an/sm |
| 62 | *002:01 | *002:01 | 4 | 0.224 | 36  | MI | an    |
| 63 | *002:01 | *002:01 | 4 | 0     | 72  | MI | an    |
| 64 | *002:01 | *002:01 | 4 | 0.004 | 36  | MI | .     |
| 65 | *002:01 | *002:01 | 4 | 0.011 | 84  | MI | an    |
| 66 | *002:01 | *002:01 | 4 | 0.051 | 60  | MI | an    |
| 67 | *002:01 | *002:01 | 4 | 0.078 | 96  | MI | an    |
| 68 | *002:01 | *002:01 | 4 | 0.092 | 60  | MI | an    |
| 69 | *002:01 | *002:01 | 4 | 0.133 | 36  | MI | an    |
| 70 | *002:01 | *002:01 | 4 | 0.171 | 48  | IA | an    |
| 71 | *002:01 | *002:01 | 4 | 0.174 | 48  | IA | an    |
| 72 | *002:01 | *002:01 | 4 | 0.219 | 60  | MI | an    |
| 73 | *002:01 | *002:01 | 4 | 0.22  | 60  | IA | an    |
| 74 | *002:01 | *002:01 | 4 | 0.235 | 72  | MI | an/sm |
| 75 | *002:01 | *002:01 | 4 | 0.576 | 108 | MI | an/sm |
| 76 | *002:01 | *002:01 | 4 | 0.882 | 36  | MI | an    |
| 77 | *002:01 | *018:01 | 5 | 0     | 72  | MI | an    |
| 78 | *002:01 | *018:01 | 5 | 0     | 48  | MI | an    |
| 79 | *002:01 | *018:01 | 5 | 0     | 36  | MI | an    |
| 80 | *002:01 | *018:01 | 5 | 0     | 108 | MI | an    |
| 81 | *002:01 | *018:01 | 5 | 0     | 60  | IA | an    |
| 82 | *002:01 | *018:01 | 5 | 0     | 72  | MI | an    |
| 83 | *002:01 | *018:01 | 5 | 0     | 48  | MI | an    |
| 84 | *002:01 | *018:01 | 5 | 1.283 | 108 | MI | an    |
| 85 | *002:01 | *018:01 | 5 | 0.003 | 48  | MI | .     |
| 86 | *002:01 | *018:01 | 5 | 0.044 | 62  | MI | an    |
| 87 | *002:01 | *018:01 | 5 | 0.091 | 83  | MI | an    |

|     |         |         |    |       |     |    |       |
|-----|---------|---------|----|-------|-----|----|-------|
| 88  | *002:01 | *018:01 | 5  | 0.176 | 108 | MI | an    |
| 89  | *002:01 | *018:01 | 5  | 0.253 | 168 | MI | an    |
| 90  | *002:01 | *018:01 | 5  | 0.496 | 24  | MI | an    |
| 91  | *002:01 | *018:01 | 5  | 0.57  | 144 | MI | an    |
| 92  | *002:01 | *018:01 | 5  | 0.901 | 84  | MI | an    |
| 93  | *002:01 | *018:01 | 5  | 0.996 | 48  | MI | an    |
| 94  | *018:01 | *002:01 | 5  | 1.088 | 35  | MI | an    |
| 95  | *018:01 | *002:01 | 5  | 1.242 | 60  | MI | an    |
| 96  | *002:01 | *018:01 | 5  | 1.31  | 96  | MI | an    |
| 97  | *002:01 | *018:01 | 5  | 1.315 | 60  | MI | an    |
| 98  | *002:01 | *032:01 | 6  | 0     | 24  | MI | an    |
| 99  | *033:01 | *033:01 | 7  | 0     | 84  | MI | an    |
| 100 | *002:01 | *033:01 | 8  | 0     | 72  | MI | an    |
| 101 | *033:01 | *002:01 | 8  | 0     | 48  | IA | an    |
| 102 | *002:01 | *016:01 | 9  | 0     | 60  | MI | an    |
| 103 | *016:01 | *002:01 | 9  | 0.028 | 132 | MI | sm    |
| 104 | *008:01 | *026:01 | 10 | 0     | 36  | MI | an    |
| 105 | *026:01 | *002:01 | 11 | 0     | 48  | IA | an    |
| 106 | *026:01 | *002:01 | 11 | 0     | 48  | IA | an    |
| 107 | *002:01 | *026:01 | 11 | 1.704 | 96  | MI | an/sm |
| 108 | *026:01 | *002:01 | 11 | 0.001 | 24  | MI | an    |
| 109 | *026:01 | *002:01 | 11 | 0.04  | 96  | MI | an    |
| 110 | *026:01 | *002:01 | 11 | 0.603 | 36  | MI | an    |
| 111 | *026:01 | *002:01 | 11 | 0.917 | 84  | MI | an    |
| 112 | *002:01 | *026:01 | 11 | 1.174 | 120 | MI | an    |
| 113 | *026:01 | *002:01 | 11 | 1.603 | 84  | MI | an/sm |
| 114 | *002:01 | *001:01 | 12 | 0     | 84  | IA | an    |
| 115 | *002:01 | *001:01 | 12 | 0.201 | 24  | MI | an    |
| 116 | *001:01 | *002:01 | 12 | 0.295 | 73  | MI | an    |
| 118 | *002:01 | *010:01 | 14 | 0     | 96  | MI | an/sm |

|     |         |         |    |       |     |    |       |
|-----|---------|---------|----|-------|-----|----|-------|
| 119 | *033:01 | *037:01 | 15 | 0     | 48  | MI | an    |
| 120 | *018:01 | *026:01 | 16 | 0.046 | 60  | MI | an/sm |
| 121 | *026:01 | *018:01 | 16 | 1.012 | 36  | MI | an    |
| 122 | *026:01 | *018:01 | 16 | 1.304 | 48  | MI | an/sm |
| 123 | *026:01 | *018:01 | 16 | 0.076 | 60  | MI | an    |
| 124 | *026:01 | *018:01 | 16 | 0.093 | 24  | MI | an    |
| 125 | *026:01 | *018:01 | 16 | 0.271 | 36  | MI | an    |
| 126 | *026:01 | *018:01 | 16 | 0.304 | 24  | MI | an    |
| 127 | *026:01 | *018:01 | 16 | 0.401 | 120 | MI | an    |
| 128 | *026:01 | *018:01 | 16 | 0.452 | 72  | MI | an    |
| 129 | *026:01 | *018:01 | 16 | 1.049 | 36  | MI | an    |
| 130 | *026:01 | *018:01 | 16 | 1.51  | 24  | MI | an    |
| 131 | *026:01 | *018:01 | 16 | 1.681 | 72  | MI | an    |
| 132 | *026:01 | *018:01 | 16 | 2.008 | 72  | MI | an    |
| 133 | *026:01 | *018:01 | 16 | 2.543 | 60  | IA | an    |
| 134 | *048:02 | *048:02 | 17 | 0.1   | 84  | MI | an    |
| 135 | *048:02 | *048:02 | 17 | 0.65  | 24  | MI | .     |
| 136 | *007:01 | *007:01 | 18 | 0.21  | 84  | MI | an/sm |
| 137 | *007:01 | *007:01 | 18 | 0.376 | 72  | MI | an    |
| 138 | *007:01 | *007:01 | 18 | 0.047 | 96  | MI | an    |
| 139 | *016:01 | *016:01 | 19 | 0.387 | 60  | MI | an    |
| 140 | *008:01 | *018:01 | 20 | 0.476 | 72  | MI | an/sm |
| 141 | *008:01 | *018:01 | 20 | 0.827 | 36  | MI | an    |
| 142 | *009:02 | *009:02 | 21 | 1.124 | 36  | MI | an/sm |
| 143 | *009:01 | *009:01 | 23 | 0.009 | 134 | MI | an    |
| 144 | *008:01 | *008:01 | 24 | 0.796 | 60  | MI | an/sm |
| 145 | *008:01 | *008:01 | 24 | 1.912 | 108 | MI | .     |
| 146 | *015:01 | *015:01 | 25 | 0.053 | 60  | IA | an    |
| 147 | *011:01 | *026:01 | 26 | 0.066 | 48  | IA | an    |
| 148 | *032:01 | *018:01 | 27 | 0.133 | 60  | MI | an    |

|                                                |         |         |    |       |     |    |       |
|------------------------------------------------|---------|---------|----|-------|-----|----|-------|
| 149                                            | *018:01 | *032:01 | 27 | 0.43  | 24  | MI | an    |
| 150                                            | *018:01 | *032:01 | 27 | 0.862 | 48  | IA | an    |
| 151                                            | *018:01 | *032:01 | 27 | 1.79  | 108 | MI | .     |
| 152                                            | *007:01 | *026:01 | 28 | 0.237 | 144 | MI | an    |
| 153                                            | *032:01 | *001:01 | 29 | 0.467 | 108 | MI | an    |
| 154                                            | *002:01 | *009:01 | 30 | 0.793 | 24  | MI | an/sm |
| 155                                            | *018:01 | *015:01 | 31 | 0.834 | 72  | MI | .     |
| 156                                            | *006:01 | *006:01 | 32 | 1.001 | 36  | MI | an    |
| 157                                            | *018:01 | *001:01 | 33 | 2.086 | 60  | IA | an    |
| *indicates allele at the BoLA-DRB3 gene locus. |         |         |    |       |     |    |       |

Supplementary Figure S1.

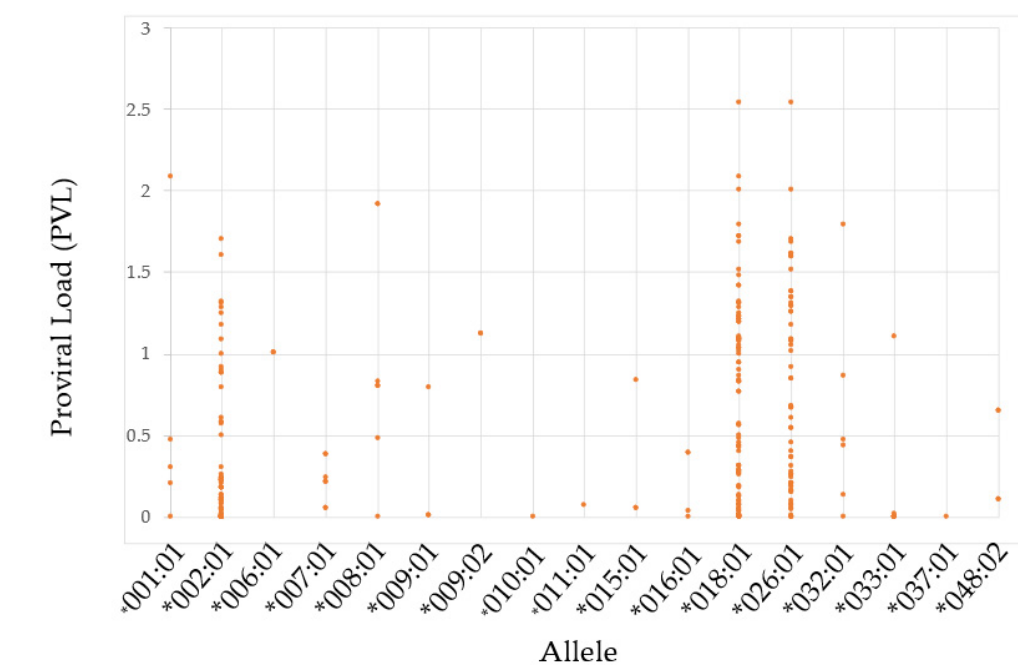

\*indicates allele at the BoLA-DRB3 gene locus.

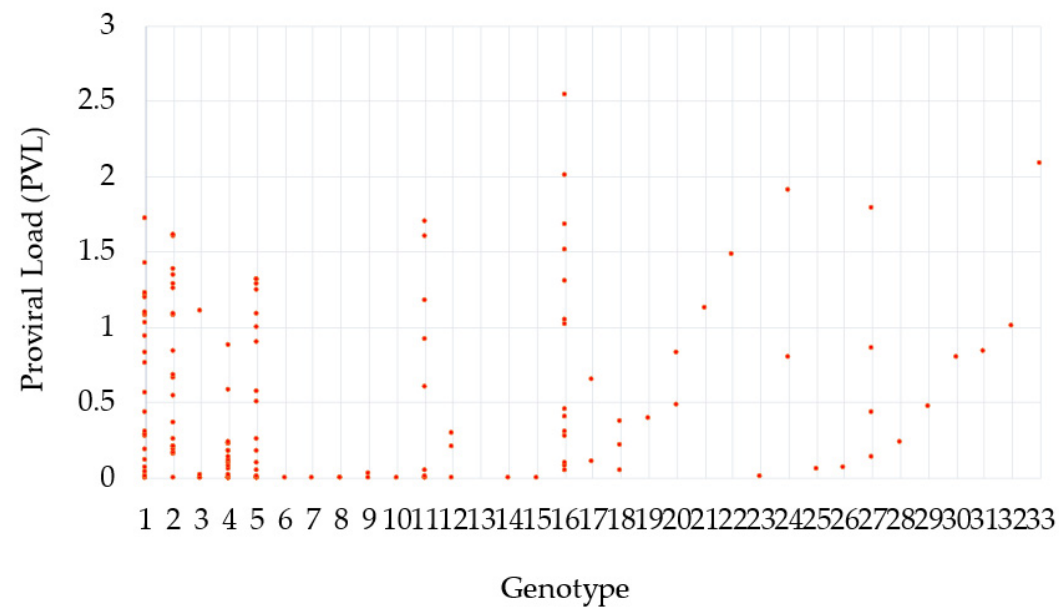

**Supplementary Figure S1.** Proviral Loads of Study Population based upon Alleles and Genotypes. Red dots indicate one animal. Genotypes are organized as described in Supplementary Table 2.



**Supplementary Table S2.** Genotypes and Respective Frequencies within Study Population

| Genotype | BoLA_DRB3_Allele_1 | BoLA_DRB3_Allele_2 | Individual Count | Genotypic Frequency |
|----------|--------------------|--------------------|------------------|---------------------|
| 1        | *018:01            | *018:01            | 25               | 0.1592              |
| 2        | *026:01            | *026:01            | 20               | 0.1274              |
| 3        | *018:01            | *033:01            | 5                | 0.0318              |
| 4        | *002:01            | *002:01            | 26               | 0.1656              |
| 5        | *002:01            | *018:01            | 21               | 0.1338              |
| 6        | *002:01            | *032:01            | 1                | 0.0064              |
| 7        | *033:01            | *033:01            | 1                | 0.0064              |
| 8        | *002:01            | *033:01            | 2                | 0.0127              |
| 9        | *002:01            | *016:01            | 2                | 0.0127              |
| 10       | *008:01            | *026:01            | 1                | 0.0064              |
| 11       | *002:01            | *026:01            | 9                | 0.0573              |
| 12       | *001:01            | *002:01            | 3                | 0.0191              |
| 13       | *037:01            | *037:01            | 1                | 0.0064              |
| 14       | *002:01            | *010:01            | 1                | 0.0064              |
| 15       | *033:01            | *037:01            | 1                | 0.0064              |
| 16       | *018:01            | *026:01            | 14               | 0.0892              |
| 17       | *048:02            | *048:02            | 2                | 0.0127              |
| 18       | *007:01            | *007:01            | 3                | 0.0191              |

|    |         |         |     |        |
|----|---------|---------|-----|--------|
| 19 | *016:01 | *016:01 | 1   | 0.0064 |
| 20 | *008:01 | *018:01 | 2   | 0.0127 |
| 21 | *009:02 | *009:02 | 1   | 0.0064 |
| 23 | *009:01 | *009:01 | 1   | 0.0064 |
| 24 | *008:01 | *008:01 | 2   | 0.0127 |
| 25 | *015:01 | *015:01 | 1   | 0.0064 |
| 26 | *011:01 | *026:01 | 1   | 0.0064 |
| 27 | *018:01 | *032:01 | 4   | 0.0255 |
| 28 | *007:01 | *026:01 | 1   | 0.0064 |
| 29 | *001:01 | *032:01 | 1   | 0.0064 |
| 30 | *002:01 | *009:01 | 1   | 0.0064 |
| 31 | *015:01 | *018:01 | 1   | 0.0064 |
| 32 | *006:01 | *006:01 | 1   | 0.0064 |
| 33 | *001:01 | *018:01 | 1   | 0.0064 |
|    | TOTAL   |         | 157 | 1      |

\*indicates allele at the BoLA-DRB3 gene locus.
